# Supplementary material for: Genome-wide identification and characterization of JAZ gene family in upland cotton (Gossypium hirsutum)
Source: PubMed Central journal article supplement (PMC5459830; doi:10.1038/s41598-017-03155-4), 2017-06-05
Supplement: 41598_2017_3155_MOESM1_ESM.pdf [file 41598_2017_3155_MOESM1_ESM.pdf]

**Genome-wide identification and characterization of *JAZ* gene family in upland cotton (*Gossypium hirsutum*)**

Wen Li, Xiao-Cong Xia, Li-Hong Han, Ping Ni, Jing-Qiu Yan, Miao Tao, Geng-Qing Huang, Xue-Bao Li

## Supplementary Information

**Supplementary Table 1.** Gene-specific primers used in isolation of *GhJAZ* genes and vector construction.

| Primer name          | Primer sequence                          |
|----------------------|------------------------------------------|
| <i>JAZ1-D P1</i>     | 5'-CTTCATATGATGTTTGGTTCACCGGAGAAAC-3'    |
| <i>JAZ1-D P2</i>     | 5'-CTTGGATCCCTACTGCAGTGATTCAACAGCT-3'    |
| <i>JAZ2-A P1</i>     | 5'-CTTCATATGATGAATATGTCGTGTTACCGGA-3'    |
| <i>JAZ2-A P2</i>     | 5'-CTTGGATCCCTACGGAGATTGAGCAGCCAAACC-3'  |
| <i>JAZ3-D P1</i>     | 5'-CTTCATATGATGGAGAGAGATTTTCTCGGTT-3'    |
| <i>JAZ3-D P2</i>     | 5'-CTTGGATCCCTTAATTGATGGCTGTAAAAGGAC-3'  |
| <i>JAZ5-A P1</i>     | 5'-CTTCATATGATGTCTAATTTAGGGCAAAAATC-3'   |
| <i>JAZ5-A P2</i>     | 5'-CTTGGATCCCTATAAGTTGAGATCAATGTC-3'     |
| <i>JAZ7-A P1</i>     | 5'-CTTCATATGATGAGACGAAACTGCAACTTGG-3'    |
| <i>JAZ7-A P2</i>     | 5'-CTTGGATCCCTAATGGTAAGGAGAGGTAGC-3'     |
| <i>JAZ10-A P1</i>    | 5'-CTTGAATTCATGTCGAGAGCTAGCGTCGAGCT-3'   |
| <i>JAZ10-A P2</i>    | 5'-CTTGGATCCCTAGCAAGCATATGGAGATGCAC-3'   |
| <i>JAZ11-D P1</i>    | 5'-CTTCATATGATGGAAGAAGAAGCTGAATCAC-3'    |
| <i>JAZ11-D P2</i>    | 5'-CTTGGATCCCTTACGCAACATGAGCTGGAGCT-3'   |
| <i>JAZ12-D P1</i>    | 5'-CTTCATATGATGGAAGGGGAAGCTGGTTCAT-3'    |
| <i>JAZ12-D P2</i>    | 5'-CTTCTGCAGTTATGCAACATGAGCTGGAGCT-3'    |
| <i>JAZ13-D P1</i>    | 5'-CTTCATATGATGTCGCTTGCTCGGAATCTAC-3'    |
| <i>JAZ13-D P2</i>    | 5'-CTTGGATCCCTATGGTGATTGAGCAGCCAAAC-3'   |
| <i>MYC2 P1</i>       | 5'-CTTCATATGATGACGGACTATCAGTTAGCACC-3'   |
| <i>MYC2 P2</i>       | 5'-CTTCTCGAGCTATCTTGCATCTCCAAGTTTGG-3'   |
| <i>MYC3 P1</i>       | 5'-CTTCATATGATGAATCTTTGGTTCGGACGATAAC-3' |
| <i>MYC3 P2</i>       | 5'-CTTGGATCCCTATCTTGGATCTCCAACCTTTGG-3'  |
| <i>CO11 P1</i>       | 5'-GGGCATATGATGGAGGAAAATGATAGCCAAC-3'    |
| <i>CO11 P2</i>       | 5'-CTTGAGCTCTTACAGCACCGGATCCAAAGG-3'     |
| <i>MYB2 P1</i>       | 5'-CTTCATATGATGGCTCCAAAGAAGGCTGGAG-3'    |
| <i>MYB2 P2</i>       | 5'-CTTCTCGAGTTATAACCATTGCTAATGGATCCT-3'  |
| <i>MYB23 P1</i>      | 5'-CTTCATATGATGGCCATGGAGGCCAGT-3'        |
| <i>MYB23 P2</i>      | 5'-CTTGTCGACTTAGGCAAAGCCATGCCAAAC-3'     |
| <i>MYB25 P1</i>      | 5'-CTTCATATGATGGGGAGATCACCATGTTGTG-3'    |
| <i>MYB25 P2</i>      | 5'-CTTGGATCCCTCATAAACCATTAAATCCAAAC-3'   |
| <i>MYB25-like P1</i> | 5'-CTTCATATGATGCAGCAGTCTCCATGTAGCG-3'    |
| <i>MYB25-like P2</i> | 5'-CTTGGATCCCTCAAAGACAGAAGAACCAGATG-3'   |
| <i>DEL65 P1</i>      | 5'-CTTGGATCCACATGTCTACTGGAGTTCAACATC-3'  |
| <i>DEL65 P2</i>      | 5'-CTTCTGCAGTCAACACTTGCTAGCAATTCTT-3'    |
| <i>NINJA P1</i>      | 5'-GTTTCATATGCATACGACGTACCAGATTACG-3'    |
| <i>NINJA P2</i>      | 5'-GTTGGATCCCTCAGGTCTGAGCAGAGCCGG-3'     |

**Supplementary Table 2.** Gene-specific primers used in RT-PCR analysis

| <b>Primer name</b>  | <b>Primer sequence</b>       |
|---------------------|------------------------------|
| <i>GhJAZ1-A P1</i>  | 5'-AATATCCGAACCAATTTAC-3'    |
| <i>GhJAZ1-A P2</i>  | 5'-ATTTCCGGGTTTCGGCGGC-3'    |
| <i>GhJAZ1-D P1</i>  | 5'-AATATCCGAACCAATGTAT-3'    |
| <i>GhJAZ1-D P2</i>  | 5'-ATTTCCGGGTTTCGGAGGT-3'    |
| <i>GhJAZ2-A P1</i>  | 5'-AGGATAGGATGACCACGAGG-3'   |
| <i>GhJAZ2-A P2</i>  | 5'-GCCGATACCTAGAAACCAA-3'    |
| <i>GhJAZ2-D P1</i>  | 5'-AGGATAGGATGACCACAAGT-3'   |
| <i>GhJAZ2-D P2</i>  | 5'-GCCGATAACTAGAAACCAG-3'    |
| <i>GhJAZ3-A P1</i>  | 5'-ATAGGAGCTTTAGCATCCG-3'    |
| <i>GhJAZ3-D P1</i>  | 5'-ATAGGAGCTTTAGCATCTA-3'    |
| <i>GhJAZ3 P2</i>    | 5'-GAGGCTCGATCCTTAATTGATG-3' |
| <i>GhJAZ4-A P1</i>  | 5'-TGCTTCTGTTTCAGCATGATGC-3' |
| <i>GhJAZ4-D P1</i>  | 5'-TCTTCTGTTTCAGCATGATGT-3'  |
| <i>GhJAZ4 P2</i>    | 5'-AACATTCACGGTACCAGCA-3'    |
| <i>GhJAZ5-A P1</i>  | 5'-ATCCTTCGGTTGAGCGACA-3'    |
| <i>GhJAZ5-D P1</i>  | 5'-ATCCTTCGGTTCGAGCGATG-3'   |
| <i>GhJAZ5 P2</i>    | 5'-GCCTGTATCACTAAAGGTATAC-3' |
| <i>GhJAZ6-A P1</i>  | 5'-GCTACTGCGACTGGGAAT-3'     |
| <i>GhJAZ6-A P2</i>  | 5'-CATTGGGTTTLAGGTGGTG-3'    |
| <i>GhJAZ6-D P1</i>  | 5'-TCTACCGCGACTGGGAAT-3'     |
| <i>GhJAZ6-D P2</i>  | 5'-CATCGGGTTTLAGGTGGCA-3'    |
| <i>GhJAZ7-A P1</i>  | 5'-CACCCAAAGTTTTTAATAA-3'    |
| <i>GhJAZ7-A P2</i>  | 5'-CACCGGTTCCCATCCAGTT-3'    |
| <i>GhJAZ7-D P1</i>  | 5'-CACCCAAAGCTTTTTAATCG-3'   |
| <i>GhJAZ7-D P2</i>  | 5'-CACCGGTTACATCCCGTC-3'     |
| <i>GhJAZ8-A P1</i>  | 5'-CGGATGAACGACTAAGGACTC-3'  |
| <i>GhJAZ8-A P2</i>  | 5'-GTTACTAGTAGTCATTGCTAGC-3' |
| <i>GhJAZ8-D P1</i>  | 5'-TCGGGATCGGGACCGGCT-3'     |
| <i>GhJAZ8-D P2</i>  | 5'-TTAATGGTAAGGAGAGGT-3'     |
| <i>GhJAZ9-A P1</i>  | 5'-GGCGATCTCTGCAGCAACTA-3'   |
| <i>GhJAZ9-A P2</i>  | 5'-CATCCAACATTAATATCAA-3'    |
| <i>GhJAZ9-D P1</i>  | 5'-GGCGATCTCTGCTGCAACTG-3'   |
| <i>GhJAZ9-D P2</i>  | 5'-AAACATCCAACATTAATATC-3'   |
| <i>GhJAZ10 P1</i>   | 5'-AACTCGCGGTTGAAGTTGAAG-3'  |
| <i>GhJAZ10-A P2</i> | 5'-CCATCCACTTGGACGGCATC-3'   |
| <i>GhJAZ10-D P2</i> | 5'-ACAAAACAAAATACCTCTC-3'    |
| <i>GhJAZ11-A P1</i> | 5'-CAAAAATGGTTGATGGCGC-3'    |
| <i>GhJAZ11-A P2</i> | 5'-TATTCCTCTGCACTTTGTA-3'    |
| <i>GhJAZ11-D P1</i> | 5'-CAAAAATGGCTGATGACGT-3'    |
| <i>GhJAZ11-D P2</i> | 5'-TATTCCTCTGCACTTTGTC-3'    |
| <i>GhJAZ12-A P1</i> | 5'-CCATCCAAAAGCTCCAGCTCAT-3' |

---

|                     |                                |
|---------------------|--------------------------------|
| <i>GhJAZ12-A P2</i> | 5'-AGCCCCCTAGAGGCAGTAGG-3'     |
| <i>GhJAZ12-D P1</i> | 5'-CCTCAGTGCTGCAACTTCATC-3'    |
| <i>GhJAZ12-D P2</i> | 5'-GACAACACTCTCATGGCAAAC-3'    |
| <i>GhJAZ13-A P1</i> | 5'-GAATCAAGCATTGGAGTTCCT-3'    |
| <i>GhJAZ13-A P2</i> | 5'-ACTTCGGCTCAGCAGATTACT-3'    |
| <i>GhJAZ13-D P1</i> | 5'-CAAATCAAGCATCGGAGTTCCT-3'   |
| <i>GhJAZ13-D P2</i> | 5'-TTTGGCTCAGCAGATTACTATG-3'   |
| <i>GhJAZ14-A P1</i> | 5'-ATGAGGGCAAATCAAGAAA-3'      |
| <i>GhJAZ14-D P1</i> | 5'-ATGAGGGCAAATCGAGAAG-3'      |
| <i>GhJAZ14 P2</i>   | 5'-GTAGCTTGGATTCTGTTC-3'       |
| <i>GhJAZ15 P1</i>   | 5'-CGGTTTCCGTAATCAATGTACC-3'   |
| <i>GhJAZ15-A P2</i> | 5'-ACCAAGCATAAGGGGGAGTCA-3'    |
| <i>GhJAZ15-D P2</i> | 5'-CTGGTTTAGGTGGTGTATAGC-3'    |
| <i>GhUBI1 P1</i>    | 5'-GGGATGCAAATCTTCGTGAAAAC-3'  |
| <i>GhUBI1 P2</i>    | 5'-CTGAATCTTCGCTTTCACGTTATC-3' |

---
